# Supplementary material for: Three series of MOFs featuring various metal(ii)-carboxylate chains cross-linked by dipyridyl-typed coligands: synthesis, structure, and solvent-dependent luminescence
Source: Royal Society of Chemistry journal article supplement (doi:10.1039/c3ce40109j), 2013-01-01
Supplement: c3ce40109j.pdf [file c3ce40109j.pdf]

## Supplementary Information

### **Three Series of MOFs Featuring Various Metal(II)-Carboxylate Chains Cross-Linked by Dipyridyl-Typed Coligands: Synthesis, Structure, and Solvent-Dependent Luminescence**

**Guang-Zhen Liu<sup>a</sup>, Shi-Hui Li<sup>a</sup>, Xiao-Ling Li<sup>a</sup>, Ling-Yun Xin<sup>a</sup> and Li-Ya Wang<sup>\*a,b</sup>**

<sup>a</sup> *College of Chemistry and Chemical Engineering, Luoyang Normal University, Luoyang, Henan 471022, P. R. China.*

<sup>b</sup> *College of Chemistry and Pharmacy Engineering, Nanyang Normal University, Nanyang, Henan 473061, P. R. China.*

\*Corresponding authors. Fax: +86-379-65511205; Tel: +86-0379-65523593; E-mail: [wlya@lynu.edu.cn](mailto:wlya@lynu.edu.cn)

**Table S1** Selected bond lengths (Å) and angles (°) for serials **1-3**

| <i>Compound 1</i>         |            |                     |            |
|---------------------------|------------|---------------------|------------|
| Cd(1)-N(2)                | 2.331(4)   | Cd(1)-O(4)#1        | 2.362(3)   |
| Cd(1)-O(2)                | 2.383(5)   | Cd(1)-O(3)#1        | 2.432(3)   |
| Cd(1)-N(3)#2 <sup>a</sup> | 2.439(3)   | Cd(1)-N(1)          | 2.476(4)   |
| Cd(1)-O(1)                | 2.557(5)   |                     |            |
| N(2)-Cd(1)-O(4)#1         | 93.41(12)  | N(2)-Cd(1)-O(2)     | 89.31(16)  |
| O(4)#1-Cd(1)-O(2)         | 163.17(14) | N(2)-Cd(1)-O(3)#1   | 147.75(13) |
| O(4)#1-Cd(1)-O(3)#1       | 54.65(11)  | O(2)-Cd(1)-O(3)#1   | 119.81(15) |
| N(2)-Cd(1)-N(3)#2         | 79.04(13)  | O(4)#1-Cd(1)-N(3)#2 | 84.90(11)  |
| O(2)-Cd(1)-N(3)#2         | 111.92(14) | O(3)#1-Cd(1)-N(3)#2 | 100.12(12) |
| N(2)-Cd(1)-N(1)           | 85.23(13)  | O(4)#1-Cd(1)-N(1)   | 83.61(12)  |
| O(2)-Cd(1)-N(1)           | 80.07(14)  | O(3)#1-Cd(1)-N(1)   | 86.54(12)  |
| N(3)#2-Cd(1)-N(1)         | 159.90(13) | N(2)-Cd(1)-O(1)     | 119.38(15) |
| O(4)#1-Cd(1)-O(1)         | 137.78(14) | O(2)-Cd(1)-O(1)     | 51.90(16)  |
| O(3)#1-Cd(1)-O(1)         | 91.23(14)  | N(3)#2-Cd(1)-O(1)   | 76.97(14)  |
| N(1)-Cd(1)-O(1)           | 122.15(14) |                     |            |
| <i>Compound 1a</i>        |            |                     |            |
| Cd(1)-N(2)                | 2.338(4)   | Cd(1)-N(3)#2        | 2.437(4)   |
| Cd(1)-O(4)#1 <sup>b</sup> | 2.364(3)   | Cd(1)-O(1)          | 2.467(5)   |
| Cd(1)-O(2)                | 2.401(5)   | Cd(1)-N(1)          | 2.502(4)   |
| Cd(1)-O(3)#1              | 2.417(3)   | Cd(1)-C(23)#1       | 2.720(4)   |
| N(2)-Cd(1)-O(4)#1         | 92.49(12)  | O(4)#1-Cd(1)-O(1)   | 141.79(14) |
| N(2)-Cd(1)-O(2)           | 88.39(16)  | O(2)-Cd(1)-O(1)     | 52.52(15)  |
| O(4)#1-Cd(1)-O(2)         | 159.79(14) | O(3)#1-Cd(1)-O(1)   | 95.07(14)  |
| N(2)-Cd(1)-O(3)#1         | 146.97(13) | N(3)#2-Cd(1)-O(1)   | 78.56(14)  |
| O(4)#1-Cd(1)-O(3)#1       | 54.74(11)  | N(2)-Cd(1)-N(1)     | 84.12(13)  |
| O(2)-Cd(1)-O(3)#1         | 120.61(15) | O(4)#1-Cd(1)-N(1)   | 82.37(12)  |
| N(2)-Cd(1)-N(3)#2         | 78.59(13)  | O(2)-Cd(1)-N(1)     | 77.64(14)  |
| O(4)#1-Cd(1)-N(3)#2       | 83.80(12)  | O(3)#1-Cd(1)-N(1)   | 87.04(13)  |
| O(2)-Cd(1)-N(3)#2         | 116.10(14) | N(3)#2-Cd(1)-N(1)   | 157.30(13) |
| O(3)#1-Cd(1)-N(3)#2       | 99.50(13)  | O(1)-Cd(1)-N(1)     | 122.78(14) |
| N(2)-Cd(1)-O(1)           | 116.41(15) |                     |            |
| <i>Compound 2</i>         |            |                     |            |
| Co(1)-O(7)#1 <sup>c</sup> | 2.052(3)   | Co(2)-O(6)          | 1.999(3)   |
| Co(1)-O(1)                | 2.055(3)   | Co(2)-N(6)          | 2.141(4)   |
| Co(1)-O(9)                | 2.168(3)   | Co(2)-O(3)          | 2.159(3)   |
| Co(1)-N(3)                | 2.174(4)   | Co(2)-N(2)#2        | 2.173(4)   |
| Co(1)-N(5)                | 2.182(4)   | Co(2)-O(4)          | 2.174(3)   |
| Co(1)-N(1)                | 2.209(4)   | Co(2)-N(4)#3        | 2.268(4)   |
| O(7)#1-Co(1)-O(1)         | 175.98(13) | O(6)-Co(2)-N(6)     | 91.93(15)  |
| O(7)#1-Co(1)-O(9)         | 94.88(12)  | O(6)-Co(2)-O(3)     | 168.24(14) |
| O(1)-Co(1)-O(9)           | 87.45(12)  | N(6)-Co(2)-O(3)     | 99.04(14)  |
| O(7)#1-Co(1)-N(3)         | 90.54(13)  | O(6)-Co(2)-N(2)#2   | 93.67(15)  |
| O(1)-Co(1)-N(3)           | 92.79(14)  | N(6)-Co(2)-N(2)#2   | 89.75(15)  |
| O(9)-Co(1)-N(3)           | 88.74(13)  | O(3)-Co(2)-N(2)#2   | 90.60(14)  |
| O(7)#1-Co(1)-N(5)         | 89.18(14)  | O(6)-Co(2)-O(4)     | 107.21(13) |
| O(1)-Co(1)-N(5)           | 88.52(14)  | N(6)-Co(2)-O(4)     | 159.08(14) |
| O(9)-Co(1)-N(5)           | 175.90(14) | O(3)-Co(2)-O(4)     | 61.33(12)  |
| N(3)-Co(1)-N(5)           | 90.69(14)  | N(2)#2-Co(2)-O(4)   | 97.20(13)  |

|                           |            |                     |            |
|---------------------------|------------|---------------------|------------|
| O(7)#1-Co(1)-N(1)         | 91.75(14)  | O(6)-Co(2)-N(4)#3   | 91.85(14)  |
| O(1)-Co(1)-N(1)           | 85.03(13)  | N(6)-Co(2)-N(4)#3   | 89.54(15)  |
| O(9)-Co(1)-N(1)           | 88.60(13)  | O(3)-Co(2)-N(4)#3   | 84.08(13)  |
| N(3)-Co(1)-N(1)           | 176.63(15) | N(2)#2-Co(2)-N(4)#3 | 174.45(16) |
| N(5)-Co(1)-N(1)           | 91.81(14)  | O(4)-Co(2)-N(4)#3   | 81.64(13)  |
| <b>Compound 2a</b>        |            |                     |            |
| Ni(1)-O(1)                | 2.035(5)   | Ni(2)-N(6)          | 2.092(6)   |
| Ni(1)-O(7)#1 <sup>d</sup> | 2.061(5)   | Ni(2)-N(2)#2        | 2.121(6)   |
| Ni(1)-O(9)                | 2.120(5)   | Ni(2)-O(3)          | 2.123(5)   |
| Ni(1)-N(3)                | 2.125(6)   | Ni(2)-O(4)          | 2.147(5)   |
| Ni(1)-N(5)                | 2.130(6)   | Ni(2)-N(4)#3        | 2.182(6)   |
| Ni(1)-N(1)                | 2.144(6)   | Ni(2)-C(8)          | 2.436(7)   |
| Ni(2)-O(6)                | 2.001(5)   |                     |            |
| O(1)-Ni(1)-O(7)#1         | 175.68(19) | O(6)-Ni(2)-N(6)     | 90.9(2)    |
| O(1)-Ni(1)-O(9)           | 88.54(18)  | O(6)-Ni(2)-N(2)#2   | 93.4(2)    |
| O(7)#1-Ni(1)-O(9)         | 94.32(19)  | N(6)-Ni(2)-N(2)#2   | 90.1(2)    |
| O(1)-Ni(1)-N(3)           | 93.1(2)    | O(6)-Ni(2)-O(3)     | 168.2(2)   |
| O(7)#1-Ni(1)-N(3)         | 90.2(2)    | N(6)-Ni(2)-O(3)     | 100.0(2)   |
| O(9)-Ni(1)-N(3)           | 88.2(2)    | N(2)#2-Ni(2)-O(3)   | 91.0(2)    |
| O(1)-Ni(1)-N(5)           | 88.2(2)    | O(6)-Ni(2)-O(4)     | 106.9(2)   |
| O(7)#1-Ni(1)-N(5)         | 89.0(2)    | N(6)-Ni(2)-O(4)     | 161.0(2)   |
| O(9)-Ni(1)-N(5)           | 176.6(2)   | N(2)#2-Ni(2)-O(4)   | 95.3(2)    |
| N(3)-Ni(1)-N(5)           | 90.9(2)    | O(3)-Ni(2)-O(4)     | 61.82(18)  |
| O(1)-Ni(1)-N(1)           | 85.3(2)    | O(6)-Ni(2)-N(4)#3   | 91.1(2)    |
| O(7)#1-Ni(1)-N(1)         | 91.6(2)    | N(6)-Ni(2)-N(4)#3   | 91.0(2)    |
| O(9)-Ni(1)-N(1)           | 88.7(2)    | N(2)#2-Ni(2)-N(4)#3 | 175.3(2)   |
| N(3)-Ni(1)-N(1)           | 176.5(2)   | O(3)-Ni(2)-N(4)#3   | 84.3(2)    |
| N(5)-Ni(1)-N(1)           | 92.2(2)    | O(4)-Ni(2)-N(4)#3   | 82.2(2)    |
| <b>Compound 3</b>         |            |                     |            |
| Cu(1)-O(1)                | 1.932(5)   | Cu(1)-N(2)          | 2.003(7)   |
| Cu(1)-O(3)#1 <sup>e</sup> | 1.979(5)   | Cu(1)-C(8)#1        | 2.546(8)   |
| Cu(1)-N(1)                | 1.995(6)   | O(3)-Cu(1)#2        | 1.979(5)   |
| O(1)-Cu(1)-O(3)#1         | 161.1(3)   | O(1)-Cu(1)-N(2)     | 94.6(3)    |
| O(1)-Cu(1)-N(1)           | 95.2(2)    | O(3)#1-Cu(1)-N(2)   | 88.2(3)    |
| O(3)#1-Cu(1)-N(1)         | 90.0(3)    | N(1)-Cu(1)-N(2)     | 154.3(3)   |
| <b>Compound 3a</b>        |            |                     |            |
| Cu(1)-O(3)#1 <sup>f</sup> | 1.950(2)   | Cu(1)-N(2)          | 2.024(3)   |
| Cu(1)-O(1)                | 1.965(2)   | Cu(1)-N(1)#2        | 2.025(2)   |
| O(3)#1-Cu(1)-O(1)         | 172.39(11) | O(3)#1-Cu(1)-N(1)#2 | 95.29(11)  |
| O(3)#1-Cu(1)-N(2)         | 89.27(10)  | O(1)-Cu(1)-N(1)#2   | 90.24(11)  |
| O(1)-Cu(1)-N(2)           | 87.59(11)  | N(2)-Cu(1)-N(1)#2   | 157.45(12) |
| <b>Compound 3b</b>        |            |                     |            |
| Cu(1)-O(1)                | 1.9532(19) | Cu(1)-N(2)          | 2.029(2)   |
| Cu(1)-O(3)#1 <sup>g</sup> | 1.9629(18) | Cu(1)-N(1)#2        | 2.032(2)   |
| O(1)-Cu(1)-O(3)#1         | 167.15(8)  | O(1)-Cu(1)-N(1)#2   | 89.19(9)   |
| O(1)-Cu(1)-N(2)           | 94.21(9)   | O(3)#1-Cu(1)-N(1)#2 | 93.27(9)   |
| O(3)#1-Cu(1)-N(2)         | 89.99(9)   | N(2)-Cu(1)-N(1)#2   | 149.93(10) |

Symmetry transformations used to generate equivalent atoms: (a) #1  $-x + 1/2, y - 1/2, -z + 1/2$ ; #2  $x - 1/2, y + 1/2, z$  for **1**. (b) #1  $-x + 1/2, y - 1/2, -z + 1/2$ ; #2  $x - 1/2, y + 1/2, z$  for **1a**. (c) #1  $-x + 1/2, -y + 3/2, z + 1/2$ ; #2  $y - 1/2, -x + 1/2, -z + 3/2$ ; #3  $y - 1/2, -x + 3/2, -z + 3/2$  for **2**. (d) #1  $-x + 1/2, -y + 3/2, z + 1/2$ ; #2  $y - 1/2, -x + 1/2, -z + 3/2$ ; #3  $y - 1/2, -x + 3/2, -z + 3/2$  for **2a**. (e) #1  $-x + 3/2, y + 1/2, -z + 1/2$ ; #2  $-x + 3/2, y - 1/2, -z + 1/2$  for **3**. (f) #1  $-x, -y + 1, z + 1/2$ ; #2  $x - 1/2, -y + 1/2, z + 1$  for **3a**; (g) #1  $-x, -y + 2, z + 1/2$ ; #2  $x - 1/2, -y + 3/2, z + 1$  for **3b**.

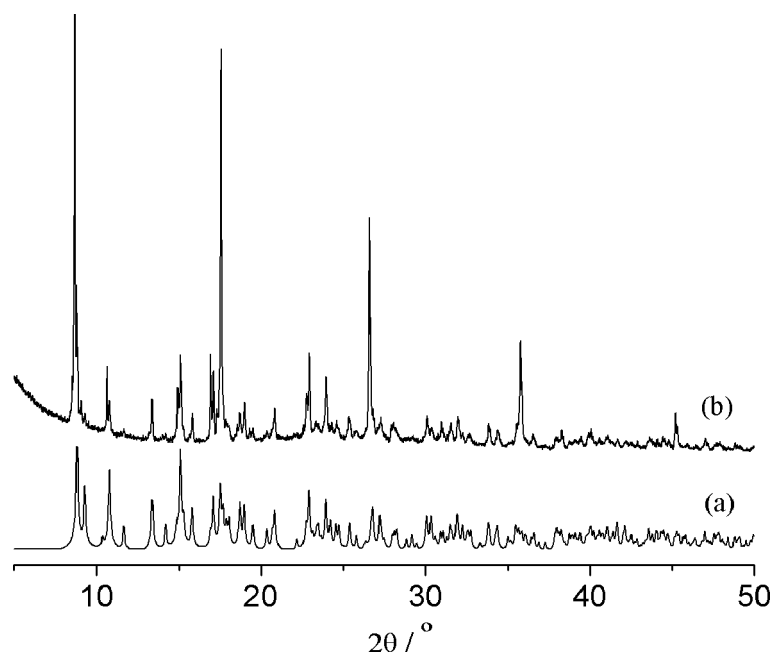

**Fig. S1** The simulated (a) and experimental (b) PXR D patterns for 1.

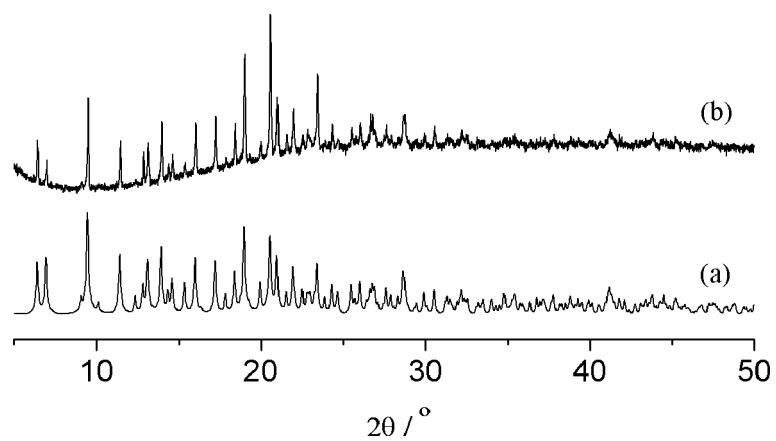

**Fig. S2** The simulated (a) and experimental (b) PXR D patterns for 2.

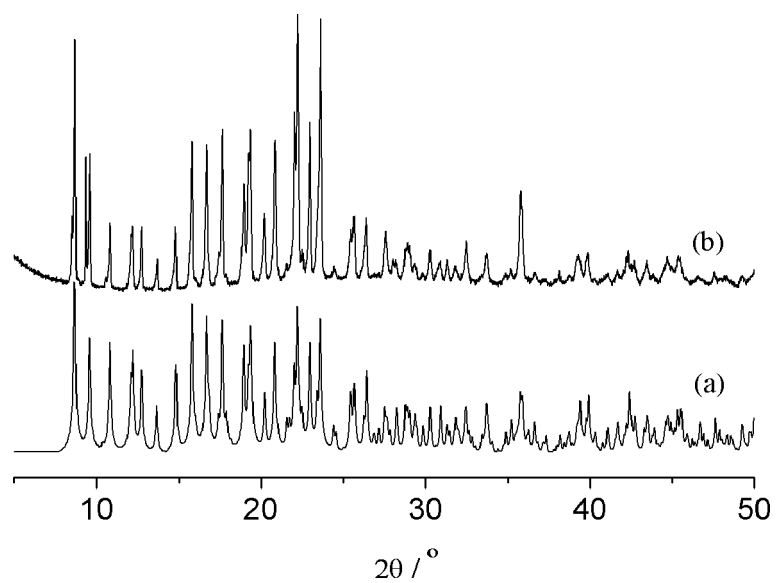

**Fig. S3** The simulated (a) and experimental (b) PXRD patterns for **3**.

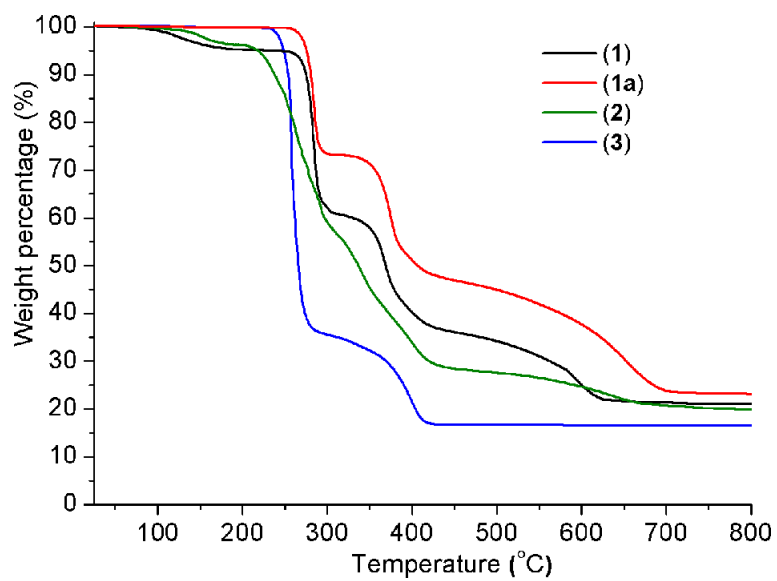

**Fig. S4** TGA plots of **1-3**.
